# Supplementary material for: Geometrically unprecedented 3-, 5- and 7-membered Hg(ii)–Cu(i) and Hg(ii)–Ag(i) thiolate clusters: precursors to intermetallics
Source: Royal Society of Chemistry journal article supplement (doi:10.1039/c4dt03500c), 2015-01-01
Supplement: c4dt03500c1.pdf [file c4dt03500c1.pdf]

### Supporting Information

To the paper entitled

## Geometrically unprecedented 3-, 5- and 7-membered Hg(II)-Cu(I) and Hg(II)-Ag(I) thiolate clusters : Precursors to intermetallics

Geetika Gupta, Jyotsna Chaturvedi and Subrato Bhattacharya\*

Department of Chemistry, Faculty of Science, Banaras Hindu University, Varanasi 221005, INDIA

**Table S1: Atomic coordinates of optimized structure of 2.**

| Center Number | Atomic Number | Coordinates (Angstroms) |           |           |
|---------------|---------------|-------------------------|-----------|-----------|
|               |               | X                       | Y         | Z         |
| 1             | 15            | 4.849268                | 1.293220  | -1.392761 |
| 2             | 29            | 3.528041                | -0.020680 | -0.032194 |
| 3             | 6             | 3.800894                | 2.293448  | -2.590755 |
| 4             | 6             | 5.964880                | 0.175373  | -2.403106 |
| 5             | 6             | 6.560055                | -0.539160 | 1.613946  |
| 6             | 15            | 4.888225                | -1.323414 | 1.308973  |
| 7             | 16            | 1.977864                | -1.148239 | -1.245127 |
| 8             | 16            | 1.938230                | 1.063321  | 1.169793  |
| 9             | 6             | 4.103829                | -1.578887 | 2.994256  |
| 10            | 6             | 5.174127                | -3.031826 | 0.597032  |
| 11            | 6             | 2.736063                | -1.852896 | 3.106014  |
| 12            | 6             | 2.158230                | -2.115526 | 4.352294  |
| 13            | 6             | 2.945495                | -2.093917 | 5.508652  |
| 14            | 80            | 0.000600                | -0.093784 | -0.030583 |
| 15            | 6             | 4.943451                | -4.180261 | 1.366279  |
| 16            | 6             | 5.208308                | -5.450430 | 0.842371  |
| 17            | 6             | 5.718733                | -5.583835 | -0.453452 |
| 18            | 16            | -1.967319               | 1.041920  | -1.192211 |
| 19            | 6             | 6.649834                | 0.600091  | 2.423224  |
| 20            | 16            | -1.928666               | -1.346751 | 1.066088  |
| 21            | 6             | 7.890559                | 1.188209  | 2.690039  |
| 22            | 6             | 9.058144                | 0.631311  | 2.156820  |
| 23            | 29            | -3.513405               | -0.200225 | -0.083003 |
| 24            | 6             | 5.450574                | -0.544443 | -3.490577 |
| 25            | 6             | 6.267636                | -1.407001 | -4.229750 |
| 26            | 15            | -4.544806               | -1.551239 | -1.646669 |
| 27            | 6             | -5.438394               | -3.044427 | -0.960115 |
| 28            | 15            | -5.145229               | 0.952369  | 1.084639  |
| 29            | 6             | -5.640511               | -0.459804 | -2.698065 |
| 30            | 6             | -4.789657               | 1.160090  | 2.911903  |
| 31            | 6             | -5.382733               | 2.691735  | 0.426223  |
| 32            | 6             | 7.615134                | -1.563654 | -3.886056 |
| 33            | 6             | 4.028556                | 3.667562  | -2.756881 |
| 34            | 6             | 3.251468                | 4.425609  | -3.639741 |
| 35            | 6             | 2.222571                | 3.818905  | -4.367810 |
| 36            | 6             | 5.879954                | 2.558502  | -0.472061 |
| 37            | 6             | 7.018365                | 3.117084  | -1.073115 |
| 38            | 6             | 7.767646                | 4.098841  | -0.415627 |

|    |   |           |           |           |
|----|---|-----------|-----------|-----------|
| 39 | 6 | 7.363978  | 4.561024  | 0.841973  |
| 40 | 6 | -6.484983 | -3.644393 | -1.674744 |
| 41 | 6 | -7.133699 | -4.778064 | -1.172511 |
| 42 | 6 | -6.714469 | -5.346731 | 0.035551  |
| 43 | 6 | -5.049012 | 0.428372  | -3.608595 |
| 44 | 6 | -5.838757 | 1.276833  | -4.391961 |
| 45 | 6 | -7.232108 | 1.255876  | -4.259636 |
| 46 | 6 | -3.228565 | -2.320684 | -2.746948 |
| 47 | 6 | -2.139091 | -2.983460 | -2.166622 |
| 48 | 6 | -1.144455 | -3.562321 | -2.961715 |
| 49 | 6 | -1.244391 | -3.506552 | -4.356223 |
| 50 | 6 | -5.352188 | 3.805784  | 1.275893  |
| 51 | 6 | -5.577331 | 5.091547  | 0.771844  |
| 52 | 6 | -5.853527 | 5.275865  | -0.587108 |
| 53 | 6 | -3.598577 | 1.764486  | 3.327398  |
| 54 | 6 | -3.368576 | 2.040655  | 4.678590  |
| 55 | 6 | -4.327845 | 1.693469  | 5.636064  |
| 56 | 6 | -6.793097 | 0.072436  | 0.954668  |
| 57 | 6 | -6.914999 | -1.234136 | 1.442389  |
| 58 | 6 | -8.136841 | -1.911218 | 1.372645  |
| 59 | 6 | -9.257603 | -1.273657 | 0.828424  |
| 60 | 6 | 8.979902  | -0.528947 | 1.378725  |
| 61 | 6 | 7.736682  | -1.117307 | 1.119874  |
| 62 | 6 | 5.950183  | -4.442195 | -1.228028 |
| 63 | 6 | 5.670962  | -3.177014 | -0.702961 |
| 64 | 6 | 4.316925  | -1.835827 | 5.406457  |
| 65 | 6 | 4.892860  | -1.596686 | 4.153563  |
| 66 | 6 | 8.137392  | -0.853773 | -2.799467 |
| 67 | 6 | 7.314572  | 0.007240  | -2.065017 |
| 68 | 6 | 6.204477  | 4.043167  | 1.428981  |
| 69 | 6 | 5.470262  | 3.051302  | 0.770605  |
| 70 | 6 | 1.985912  | 2.448866  | -4.212623 |
| 71 | 6 | 2.774313  | 1.696450  | -3.335384 |
| 72 | 6 | -2.355311 | -2.892896 | -4.945611 |
| 73 | 6 | -3.347012 | -2.315807 | -4.143771 |
| 74 | 6 | -5.628946 | -4.791130 | 0.722343  |
| 75 | 6 | -4.987005 | -3.656439 | 0.214747  |
| 76 | 6 | -7.828301 | 0.385875  | -3.339936 |
| 77 | 6 | -7.034582 | -0.465285 | -2.562995 |
| 78 | 6 | -9.152764 | 0.045158  | 0.371706  |
| 79 | 6 | -7.926604 | 0.716808  | 0.441382  |
| 80 | 6 | -5.898328 | 4.168290  | -1.440275 |
| 81 | 6 | -5.661103 | 2.888584  | -0.930552 |
| 82 | 6 | -5.519260 | 1.082476  | 5.231924  |
| 83 | 6 | -5.753631 | 0.832648  | 3.875405  |
| 84 | 6 | 1.980344  | -2.943954 | -1.192451 |
| 85 | 6 | 1.374672  | -3.668338 | -0.156053 |
| 86 | 6 | 1.347583  | -5.067257 | -0.185262 |
| 87 | 6 | 1.906263  | -5.758557 | -1.265203 |
| 88 | 6 | 1.884274  | 2.847173  | 0.914666  |
| 89 | 6 | 1.532956  | 3.421493  | -0.313712 |
| 90 | 6 | 1.488172  | 4.812128  | -0.462322 |
| 91 | 6 | 1.794632  | 5.646065  | 0.617746  |
| 92 | 6 | -1.995952 | -1.290830 | 2.860601  |
| 93 | 6 | -0.975111 | -0.706185 | 3.624205  |
| 94 | 6 | -1.008349 | -0.757954 | 5.022641  |
| 95 | 6 | -2.065598 | -1.395967 | 5.678846  |
| 96 | 6 | -2.014540 | 2.819964  | -0.925512 |
| 97 | 6 | -1.623444 | 3.406417  | 0.285172  |
| 98 | 6 | -1.644273 | 4.795686  | 0.446191  |
| 99 | 6 | -2.026735 | 5.618522  | -0.617661 |

|     |   |            |           |           |
|-----|---|------------|-----------|-----------|
| 100 | 6 | 2.492333   | -5.042815 | -2.314710 |
| 101 | 6 | 2.530019   | -3.644484 | -2.276408 |
| 102 | 6 | 2.131560   | 5.081497  | 1.852524  |
| 103 | 6 | 2.166720   | 3.690198  | 2.000519  |
| 104 | 6 | -2.392899  | 5.043210  | -1.839108 |
| 105 | 6 | -2.390565  | 3.651845  | -1.989805 |
| 106 | 6 | -3.091488  | -1.978166 | 4.926634  |
| 107 | 6 | -3.050420  | -1.931343 | 3.528939  |
| 108 | 1 | 2.114745   | -1.888213 | 2.206033  |
| 109 | 1 | 1.089441   | -2.354758 | 4.420781  |
| 110 | 1 | 2.493281   | -2.304060 | 6.487506  |
| 111 | 1 | 4.559818   | -4.092687 | 2.390064  |
| 112 | 1 | 5.020628   | -6.344638 | 1.452370  |
| 113 | 1 | 5.929060   | -6.580775 | -0.864063 |
| 114 | 1 | 5.737712   | 1.023349  | 2.862992  |
| 115 | 1 | 7.948285   | 2.082786  | 3.324464  |
| 116 | 1 | 10.033387  | 1.092470  | 2.364175  |
| 117 | 1 | 4.392685   | -0.457300 | -3.760082 |
| 118 | 1 | 5.845887   | -1.974227 | -5.070743 |
| 119 | 1 | 8.255236   | -2.249559 | -4.457480 |
| 120 | 1 | 4.815318   | 4.173920  | -2.186189 |
| 121 | 1 | 3.439752   | 5.502403  | -3.749598 |
| 122 | 1 | 1.601741   | 4.414228  | -5.050978 |
| 123 | 1 | 7.316037   | 2.799200  | -2.080813 |
| 124 | 1 | 8.659689   | 4.522822  | -0.896729 |
| 125 | 1 | 7.943415   | 5.339345  | 1.356973  |
| 126 | 1 | -6.791673  | -3.235374 | -2.645696 |
| 127 | 1 | -7.959712  | -5.232859 | -1.736259 |
| 128 | 1 | -7.215984  | -6.241983 | 0.427718  |
| 129 | 1 | -3.955686  | 0.475525  | -3.693834 |
| 130 | 1 | -5.362769  | 1.974295  | -5.094526 |
| 131 | 1 | -7.853622  | 1.932371  | -4.861999 |
| 132 | 1 | -2.065373  | -3.067960 | -1.076503 |
| 133 | 1 | -0.294430  | -4.073665 | -2.490919 |
| 134 | 1 | -0.468796  | -3.967149 | -4.983223 |
| 135 | 1 | -5.162442  | 3.681598  | 2.348443  |
| 136 | 1 | -5.545560  | 5.957773  | 1.446821  |
| 137 | 1 | -6.033865  | 6.284776  | -0.982412 |
| 138 | 1 | -2.850143  | 2.044250  | 2.580270  |
| 139 | 1 | -2.434117  | 2.528951  | 4.986022  |
| 140 | 1 | -4.147676  | 1.904506  | 6.698926  |
| 141 | 1 | -6.044724  | -1.720371 | 1.897768  |
| 142 | 1 | -8.217495  | -2.937709 | 1.754444  |
| 143 | 1 | -10.219449 | -1.801566 | 0.774196  |
| 144 | 1 | 9.895316   | -0.981981 | 0.973822  |
| 145 | 1 | 7.692752   | -2.034953 | 0.521602  |
| 146 | 1 | 6.344563   | -4.536462 | -2.248895 |
| 147 | 1 | 5.853499   | -2.286079 | -1.309756 |
| 148 | 1 | 4.946397   | -1.847063 | 6.306926  |
| 149 | 1 | 5.976716   | -1.442091 | 4.085144  |
| 150 | 1 | 9.190216   | -0.981806 | -2.513029 |
| 151 | 1 | 7.734994   | 0.540435  | -1.205885 |
| 152 | 1 | 5.869511   | 4.412469  | 2.407768  |
| 153 | 1 | 4.564388   | 2.656833  | 1.239091  |
| 154 | 1 | 1.176578   | 1.963541  | -4.774898 |
| 155 | 1 | 2.562787   | 0.627694  | -3.230855 |
| 156 | 1 | -2.456493  | -2.876530 | -6.039618 |
| 157 | 1 | -4.226834  | -1.869872 | -4.623157 |
| 158 | 1 | -5.272013  | -5.251689 | 1.653661  |
| 159 | 1 | -4.117997  | -3.247637 | 0.742019  |
| 160 | 1 | -8.919903  | 0.379565  | -3.216600 |

|     |   |            |           |           |
|-----|---|------------|-----------|-----------|
| 161 | 1 | -7.513156  | -1.125886 | -1.831946 |
| 162 | 1 | -10.033677 | 0.554769  | -0.042221 |
| 163 | 1 | -7.861887  | 1.752881  | 0.088523  |
| 164 | 1 | -6.117819  | 4.300566  | -2.508359 |
| 165 | 1 | -5.708365  | 2.022225  | -1.594556 |
| 166 | 1 | -6.281856  | 0.820211  | 5.978063  |
| 167 | 1 | -6.713547  | 0.397404  | 3.572995  |
| 168 | 1 | 0.893501   | -3.155381 | 0.684902  |
| 169 | 1 | 0.871669   | -5.622692 | 0.634534  |
| 170 | 1 | 1.879023   | -6.856467 | -1.292492 |
| 171 | 1 | 1.268293   | 2.791283  | -1.170487 |
| 172 | 1 | 1.195949   | 5.249625  | -1.426000 |
| 173 | 1 | 1.753748   | 6.737600  | 0.500995  |
| 174 | 1 | -0.122810  | -0.209576 | 3.144964  |
| 175 | 1 | -0.198602  | -0.298311 | 5.606022  |
| 176 | 1 | -2.092612  | -1.435694 | 6.776332  |
| 177 | 1 | -1.268939  | 2.786993  | 1.116833  |
| 178 | 1 | -1.334159  | 5.240641  | 1.401453  |
| 179 | 1 | -2.030034  | 6.710504  | -0.497548 |
| 180 | 1 | 2.925965   | -5.579482 | -3.169814 |
| 181 | 1 | 2.989003   | -3.099738 | -3.113032 |
| 182 | 1 | 2.361473   | 5.730390  | 2.708966  |
| 183 | 1 | 2.425422   | 3.262627  | 2.979264  |
| 184 | 1 | -2.687915  | 5.684828  | -2.680864 |
| 185 | 1 | -2.681921  | 3.217273  | -2.955946 |
| 186 | 1 | -3.926694  | -2.480285 | 5.433992  |
| 187 | 1 | -3.856102  | -2.415835 | 2.962772  |

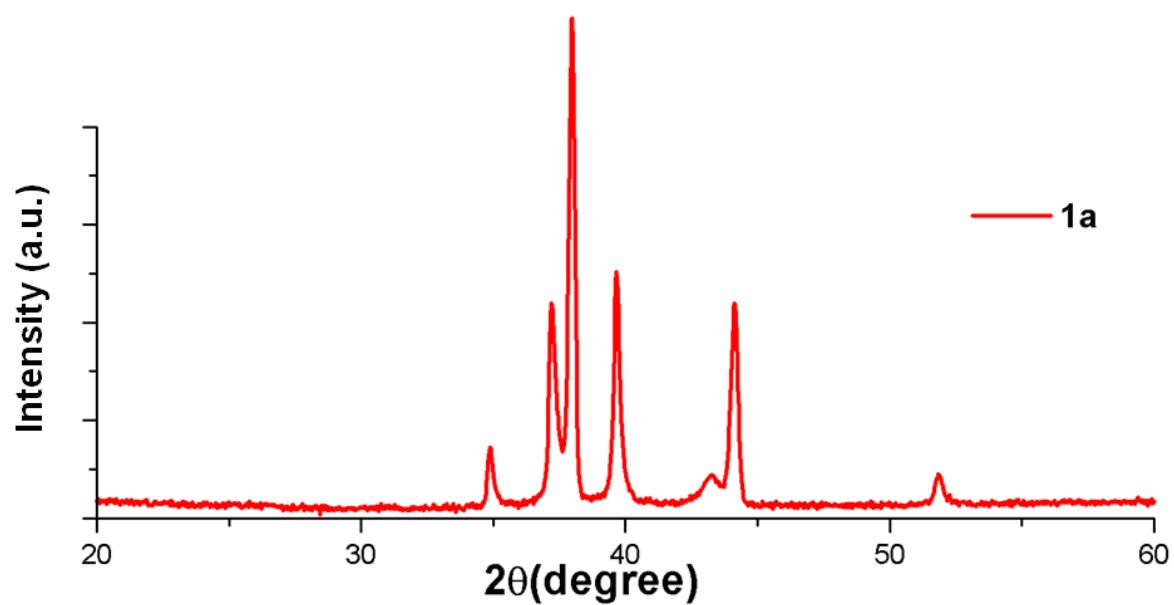

**Figure S1:** Powder XRD patterns of **1a**.

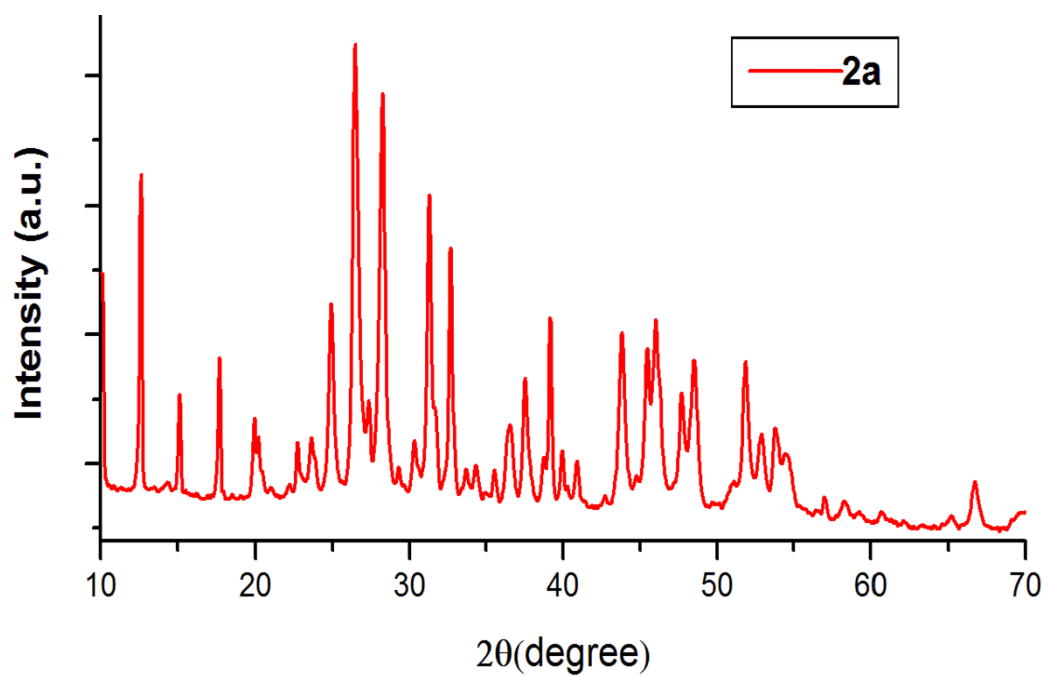

**Figure S2:** Powder XRD patterns of **2a**.

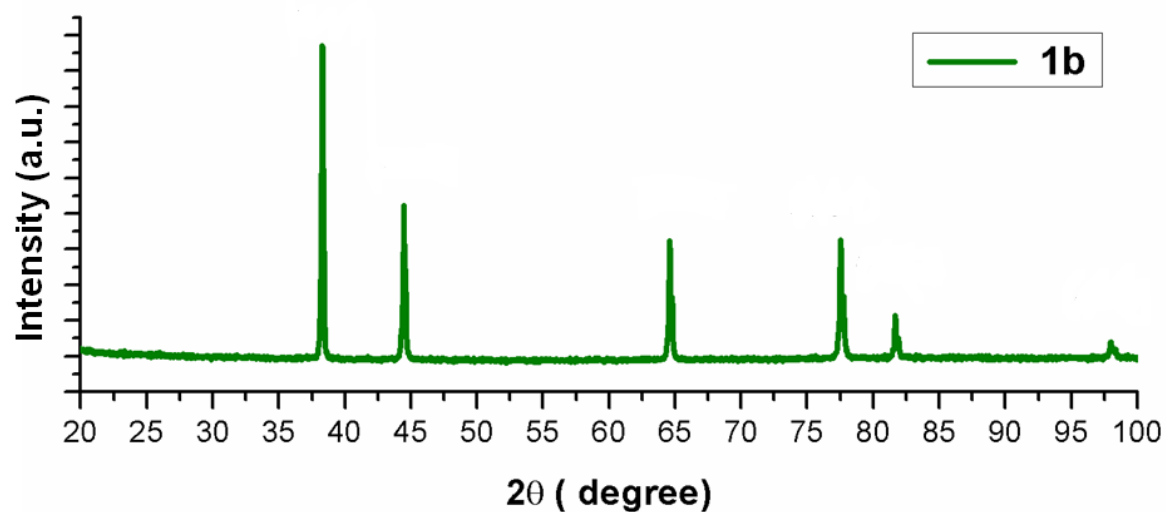

**Figure S3:** Powder XRD pattern of **1b**

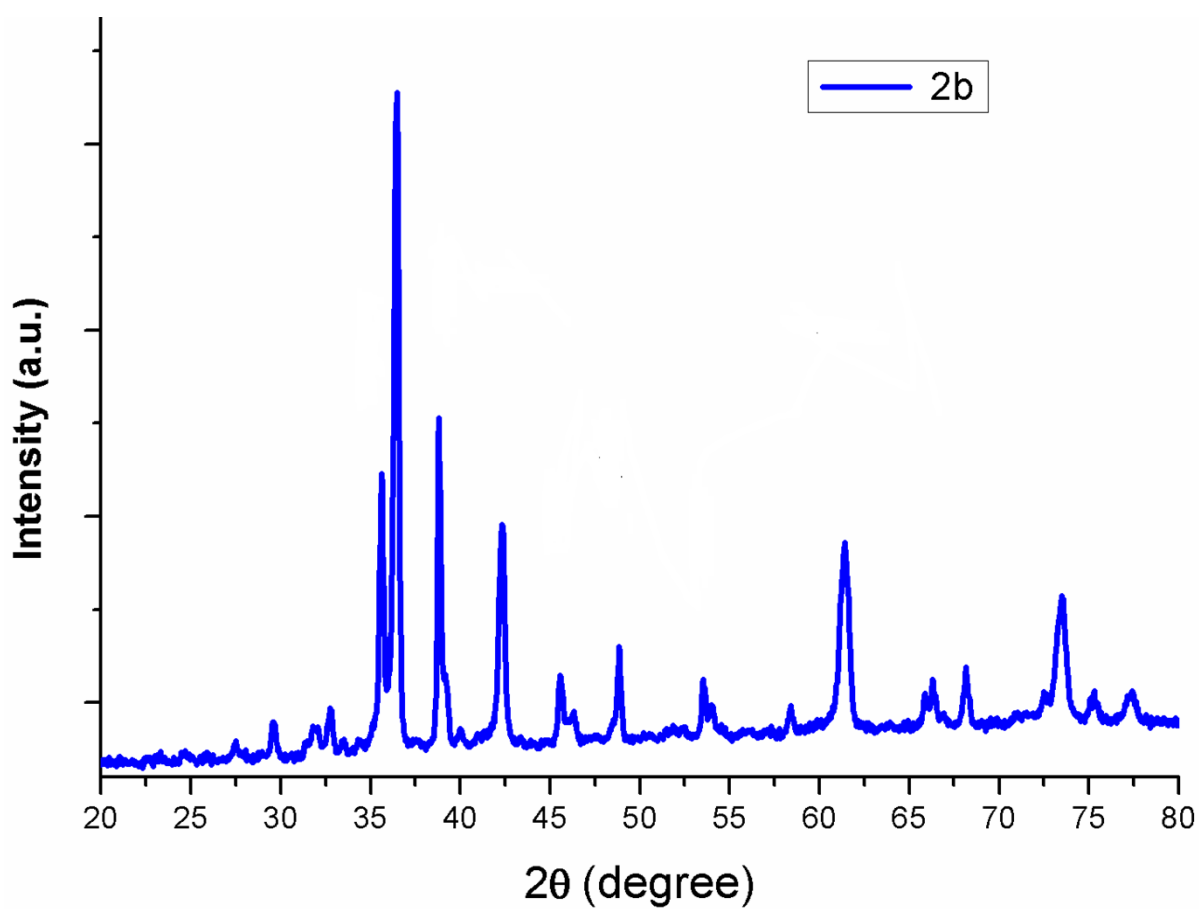

**Figure S4:** Powder XRD pattern of **2b**

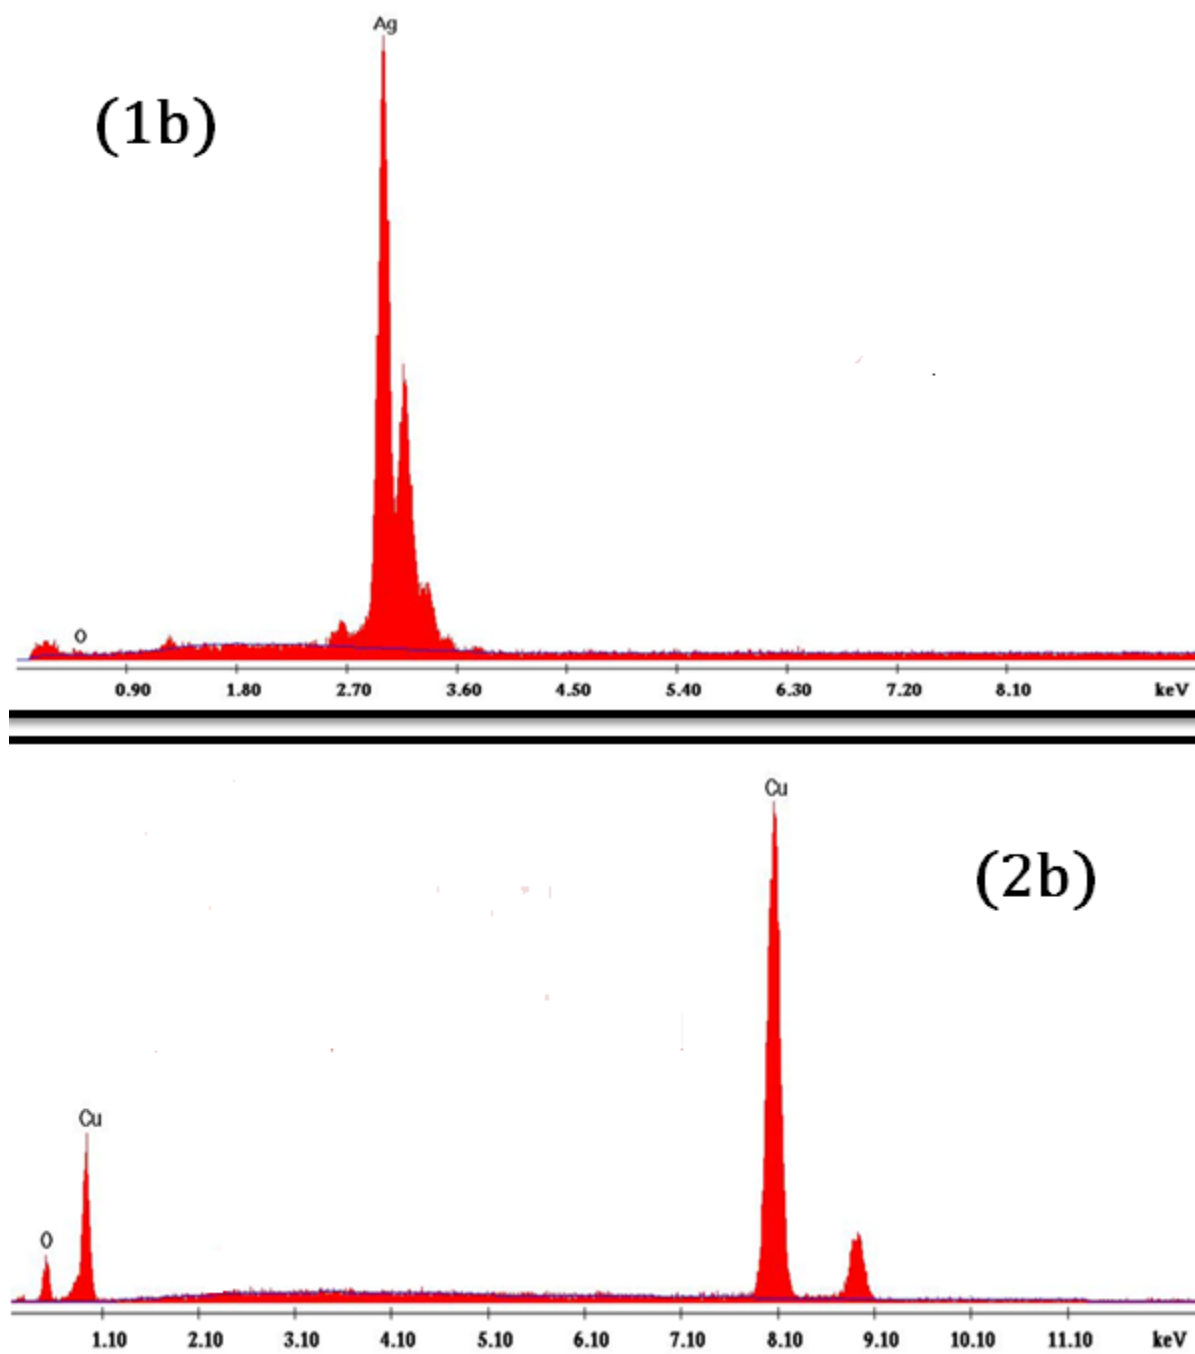

**Figure S5: EDS images of 1b and 2b**
